# Supplementary material
Source: PubMed Central journal article supplement (PMC7035787)
Supplement: NIHMS1059375-supplement-Suppmental_materail.pdf [file NIHMS1059375-supplement-Suppmental_materail.pdf]

## Supporting information

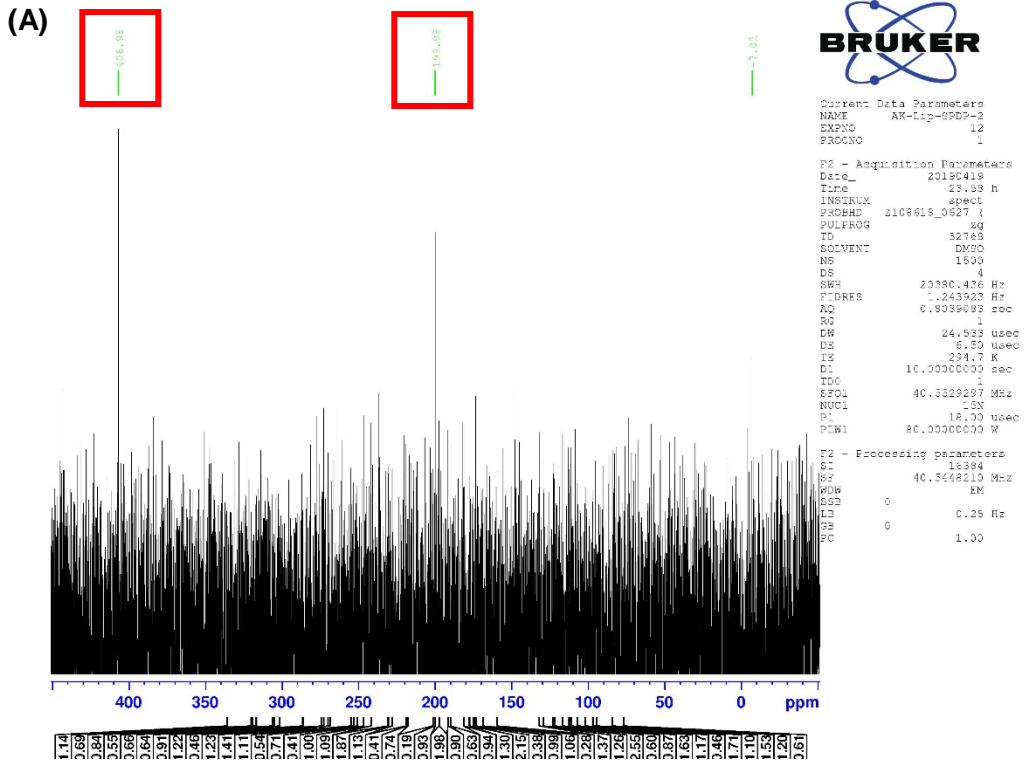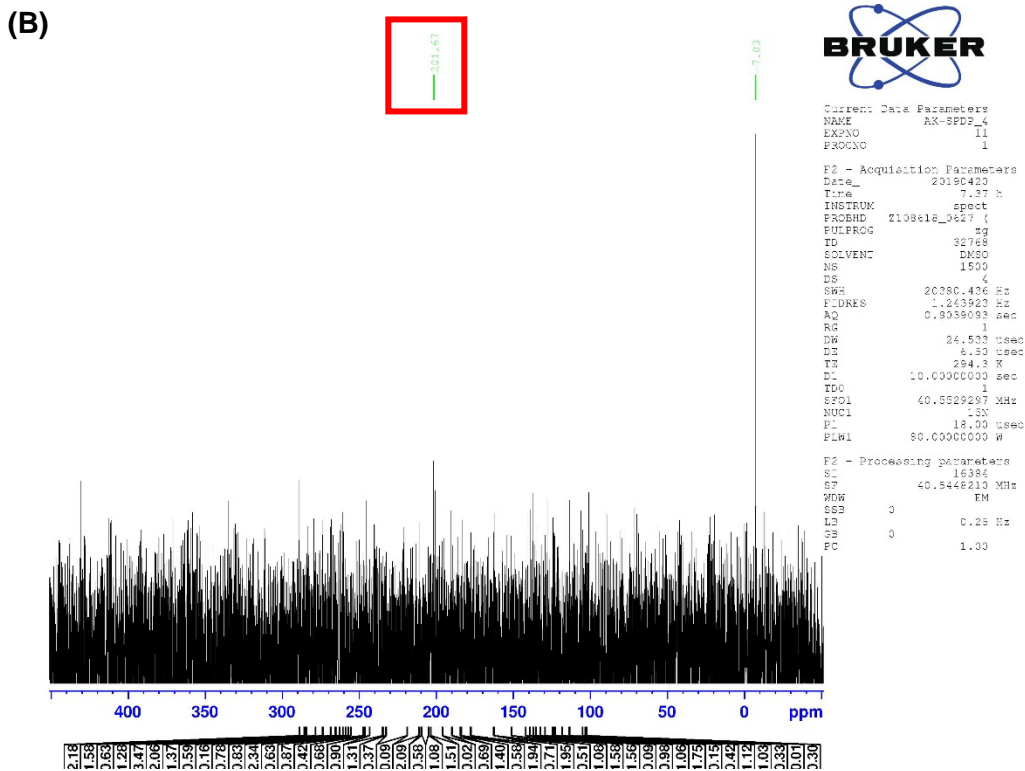

**SI Figure 1.**  $^{15}\text{N}$  NMR spectra of (A) N-Succinimidyl 1,3-(2-pyridyldithio) propionate (SPDP) and (B) liposome-SPDP conjugate.

(A)

|                        |                                                                           |                        |                      |                      |                      |
|------------------------|---------------------------------------------------------------------------|------------------------|----------------------|----------------------|----------------------|
| Acquisition Time (sec) | 4.0894                                                                    | Date                   | 19 Apr 2019 18:36:32 | Date Stamp           | 19 Apr 2019 18:36:32 |
| File Name              | \\albany.ttuhs.edu\PharmaceuticalSciAma_NMRUsers\Aho\AK-Lip-SPDP-2\10\fid |                        |                      | Frequency (MHz)      | 400.13               |
| Nucleus                | 1H                                                                        | Number of Transients   | 120                  | Origin               | spect                |
| Owner                  | nmsu                                                                      | Points Count           | 32768                | Pulse Sequence       | zg30                 |
| SW(cyclical) (Hz)      | 8012.82                                                                   | Solvent                | DMSO-d6              | Spectrum Offset (Hz) | 2470.8027            |
| Sweep Width (Hz)       | 8012.58                                                                   | Temperature (degree C) | 21.351               | Receiver Gain        | 128.00               |
|                        |                                                                           |                        |                      | Spectrum Type        | STANDARD             |

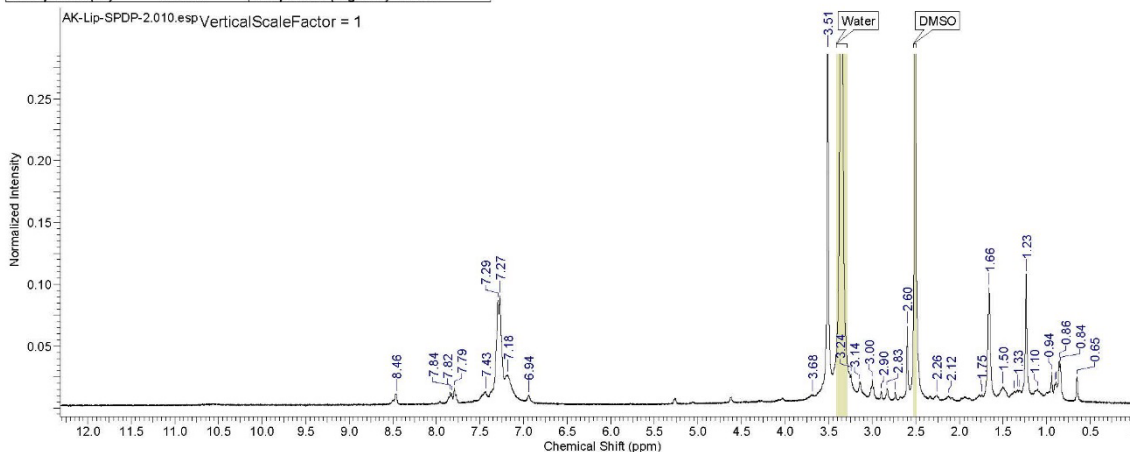

| No. | (ppm)          | Annotation | Layer No. | Created By | Created At               | Modified By | Modified At |
|-----|----------------|------------|-----------|------------|--------------------------|-------------|-------------|
| 1   | [2.49 .. 2.53] | DMSO       | 1         | mohammho   | Mon 4/22/2019 8:04:15 PM |             |             |
| 2   | [3.29 .. 3.41] | Water      | 1         | mohammho   | Mon 4/22/2019 8:04:15 PM |             |             |

(B)

|                        |                                                                     |                        |                      |                      |                      |
|------------------------|---------------------------------------------------------------------|------------------------|----------------------|----------------------|----------------------|
| Acquisition Time (sec) | 4.0894                                                              | Date                   | 20 Apr 2019 00:11:28 | Date Stamp           | 20 Apr 2019 00:11:28 |
| File Name              | \\albany.ttuhs.edu\PharmaceuticalSciAma_NMRUsers\Aho\AK-PL_3\10\fid |                        |                      | Frequency (MHz)      | 400.13               |
| Nucleus                | 1H                                                                  | Number of Transients   | 120                  | Origin               | spect                |
| Owner                  | nmsu                                                                | Points Count           | 32768                | Pulse Sequence       | zg30                 |
| SW(cyclical) (Hz)      | 8012.82                                                             | Solvent                | DMSO-d6              | Spectrum Offset (Hz) | 2470.8027            |
| Sweep Width (Hz)       | 8012.58                                                             | Temperature (degree C) | 21.678               | Receiver Gain        | 161.00               |
|                        |                                                                     |                        |                      | Spectrum Type        | STANDARD             |

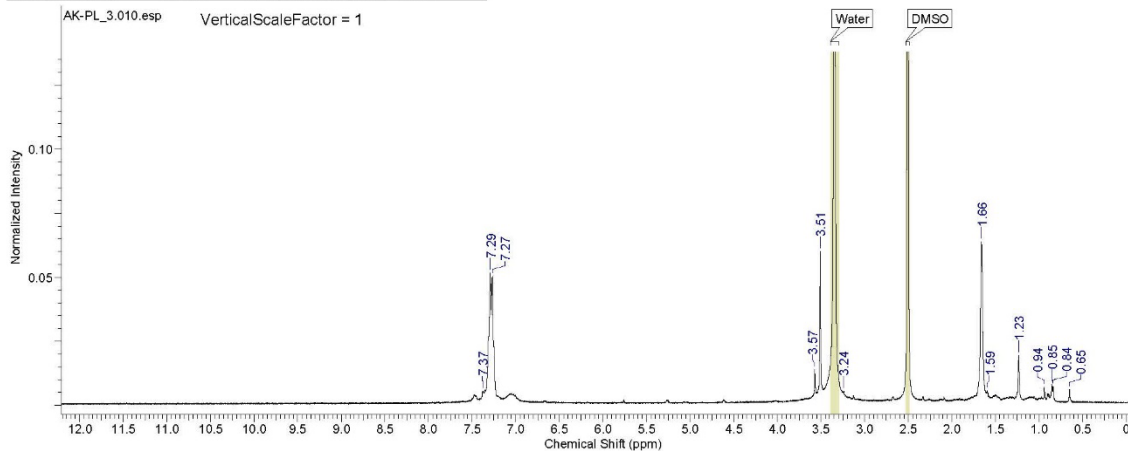

| No. | (ppm)          | Annotation | Layer No. | Created By | Created At               | Modified By | Modified At |
|-----|----------------|------------|-----------|------------|--------------------------|-------------|-------------|
| 1   | [2.49 .. 2.52] | DMSO       | 1         | mohammho   | Mon 4/22/2019 8:07:39 PM |             |             |
| 2   | [3.30 .. 3.39] | Water      | 1         | mohammho   | Mon 4/22/2019 8:07:39 PM |             |             |

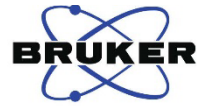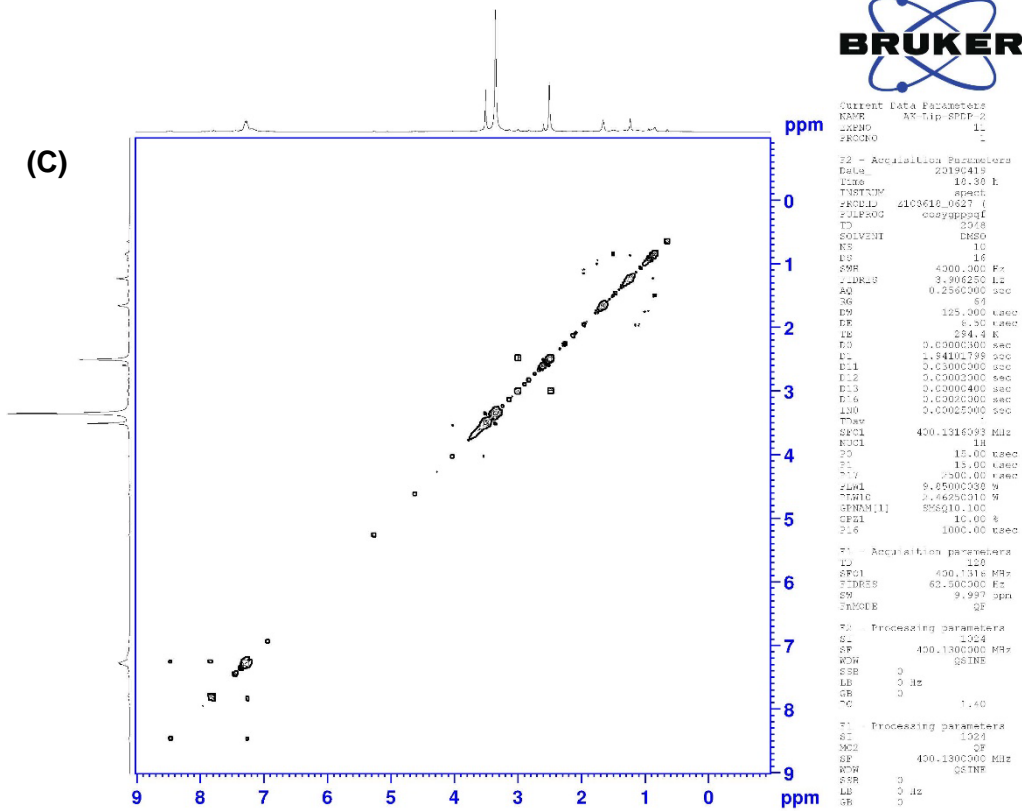

**SI Figure 2.** <sup>1</sup>H NMR spectra of (A) liposome- N-Succinimidyl 1,3-(2-pyridyldithio) propionate (SPDP), (B) CAR-conjugated liposome, and (C) 2D-correlation spectroscopy (COSY) NMR of liposome-SPDP.

**A**

|                        |                                                                         |                        |                      |                      |                      |
|------------------------|-------------------------------------------------------------------------|------------------------|----------------------|----------------------|----------------------|
| Acquisition Time (sec) | 4.0894                                                                  | Date                   | 16 Feb 2019 13:54:40 | Date Stamp           | 16 Feb 2019 13:54:40 |
| File Name              | \valbany.ttuhsic.edu\PharmaceuticalSciAma_NMRUsers\Aho\AK-0(Fas)\10\fid |                        |                      | Frequency (MHz)      | 400.13               |
| Nucleus                | 1H                                                                      | Number of Transients   | 120                  | Origin               | spect                |
| Owner                  | nmsu                                                                    | Points Count           | 32768                | Pulse Sequence       | zg30                 |
| SW(cyclical) (Hz)      | 8012.82                                                                 | Solvent                | DMSO-d6              | Spectrum Offset (Hz) | 2470.8027            |
| Sweep Width (Hz)       | 8012.58                                                                 | Temperature (degree C) | 26.386               | Receiver Gain        | 203.00               |
|                        |                                                                         |                        |                      | Spectrum Type        | STANDARD             |

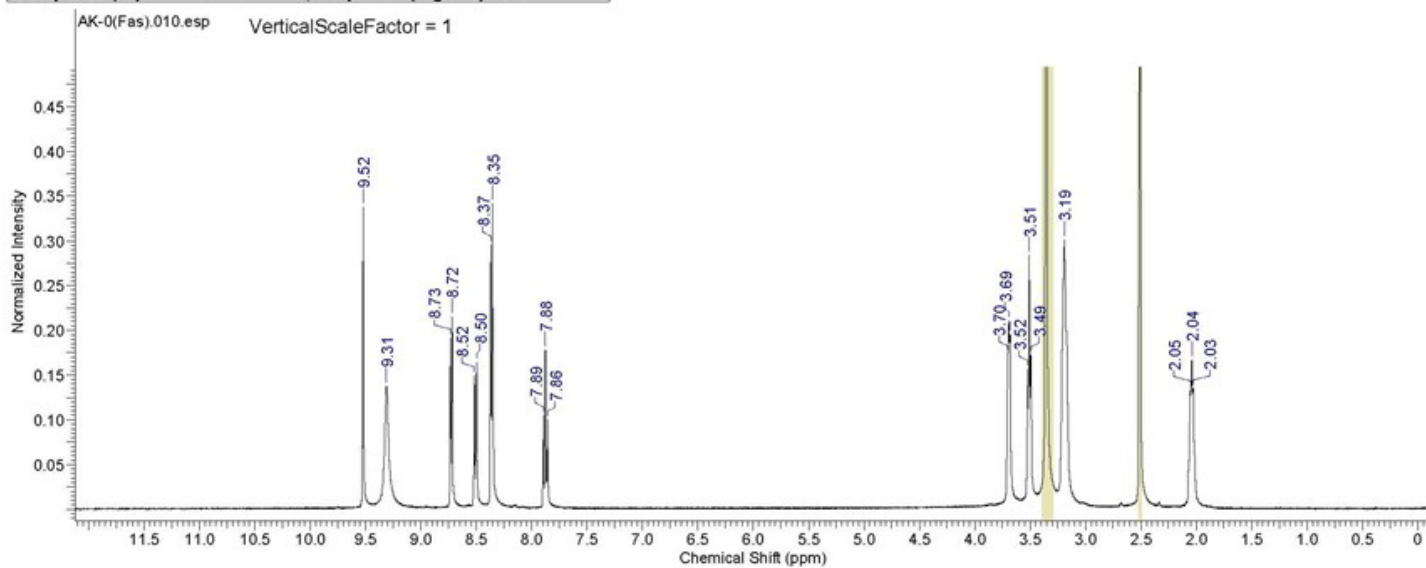

**B**

|                        |                                                                              |                        |                      |                      |                      |
|------------------------|------------------------------------------------------------------------------|------------------------|----------------------|----------------------|----------------------|
| Acquisition Time (sec) | 4.0894                                                                       | Date                   | 16 Feb 2019 18:46:56 | Date Stamp           | 16 Feb 2019 18:46:56 |
| File Name              | \valbany.ttuhsic.edu\PharmaceuticalSciAma_NMRUsers\Aho\AK-1(Fas-Lipo)\11\fid |                        |                      | Frequency (MHz)      | 400.13               |
| Nucleus                | 1H                                                                           | Number of Transients   | 120                  | Origin               | spect                |
| Owner                  | nmsu                                                                         | Points Count           | 32768                | Pulse Sequence       | zg30                 |
| SW(cyclical) (Hz)      | 8012.82                                                                      | Solvent                | DMSO-d6              | Spectrum Offset (Hz) | 2470.8027            |
| Sweep Width (Hz)       | 8012.58                                                                      | Temperature (degree C) | 22.818               | Receiver Gain        | 181.00               |
|                        |                                                                              |                        |                      | Spectrum Type        | STANDARD             |

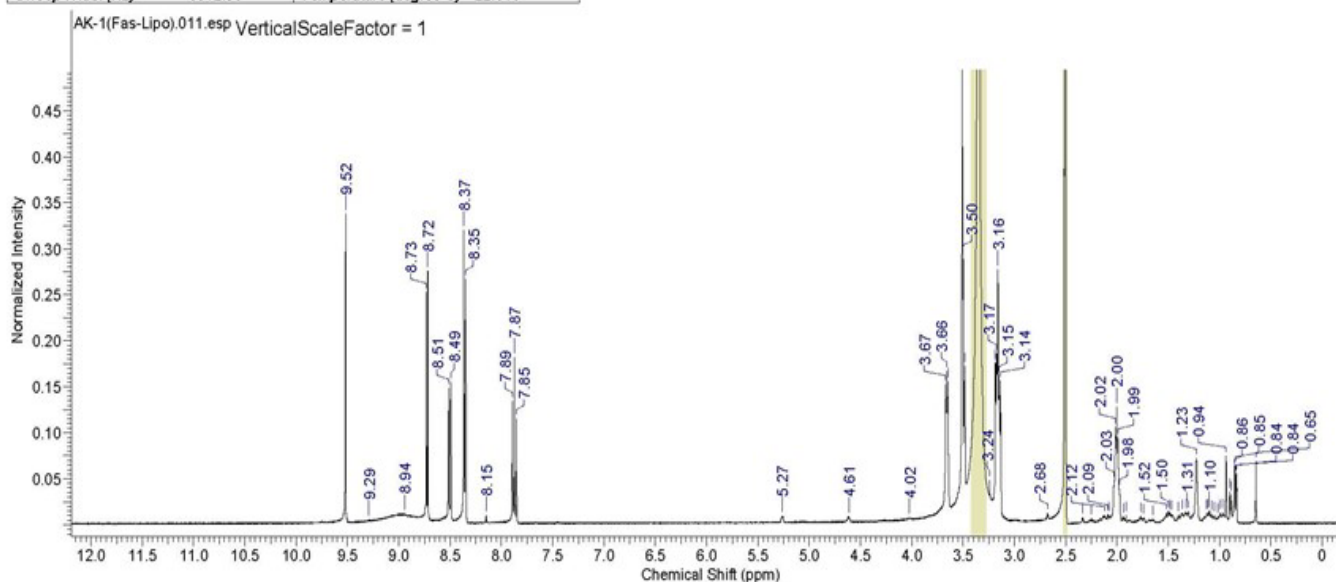

SI Figure 3. <sup>1</sup>H NMR spectra of plain fasudil (A) and CAR-conjugated liposome containing fasudil (B).

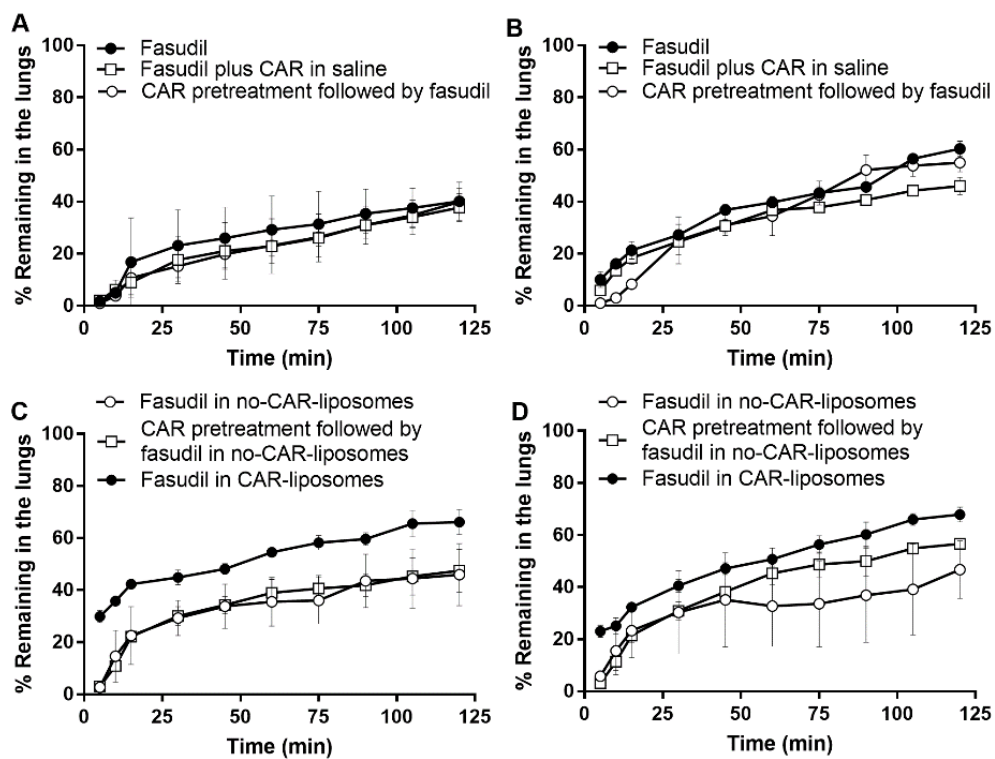

**SI Figure 4.** The percentage of fasudil, calculated, remained in the lungs and IPRL circuitry after perfusing the lungs with plain fasudil and various liposomal formulations of fasudil given via the intravenous-mimicking route (cannulated pulmonary artery) into (A and C) sham and (B and D) PAH lungs. The percentage remained was calculated by subtracting the amount of drug in the perfusate from the total amount added to the perfusion medium.

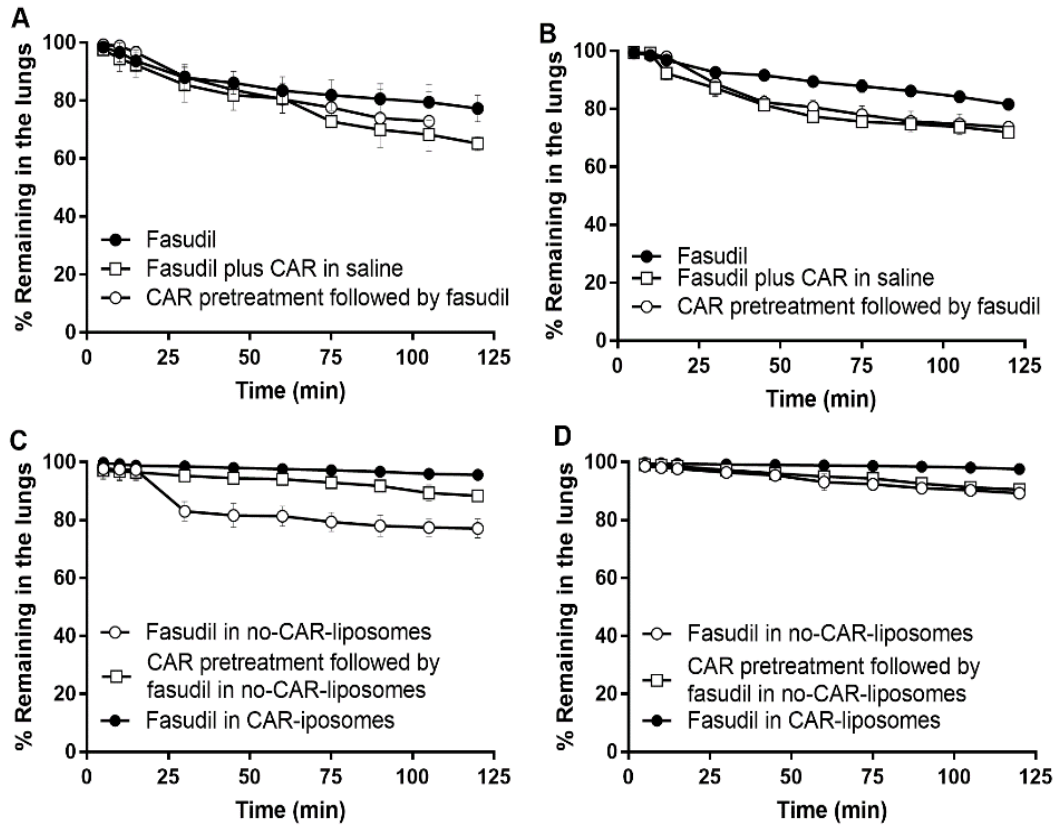

**SI Figure 5.** The percentage of fasudil, calculated, remained in the lungs and perfusate circuitry after perfusing the lungs with plain fasudil and various liposomal formulations of fasudil given via the inhalation-mimicking route (intratracheal instillation) into (A and C) sham and (B and D) PAH lungs. The percentage of drug remained was calculated by subtracting the amount of drug in the perfusate from the total amount added to the perfusion medium.
